# Supplementary material
Source: PubMed Central journal article supplement (PMC6615686)
Supplement: supp_RA119.007755_143397_2_supp_335489_prwpmk.pdf [file supp_RA119.007755_143397_2_supp_335489_prwpmk.pdf]

## SUPPLEMENT DATA

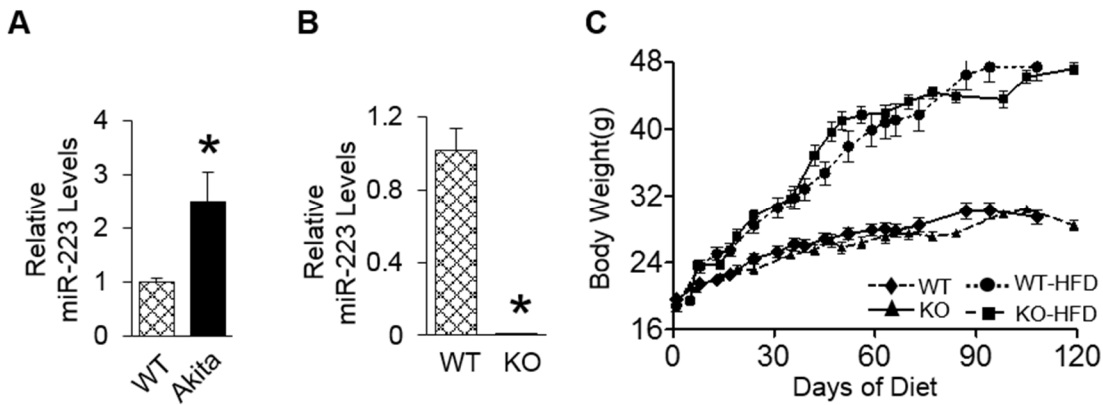

**Figure S1.** *A:* Expression of miR-223 was increased in islets of 12 wk. old Akita mice. *B:* MiR-223 was depleted in islets of KO mouse model measured by qPCR. *C:* Body weight measurement of KO mice showed no differences compared to WT controls under either CD or HFD condition. Data are shown as Mean  $\pm$  SEM (error bar). \*,  $p < 0.05$  vs. controls by  $t$ -test.

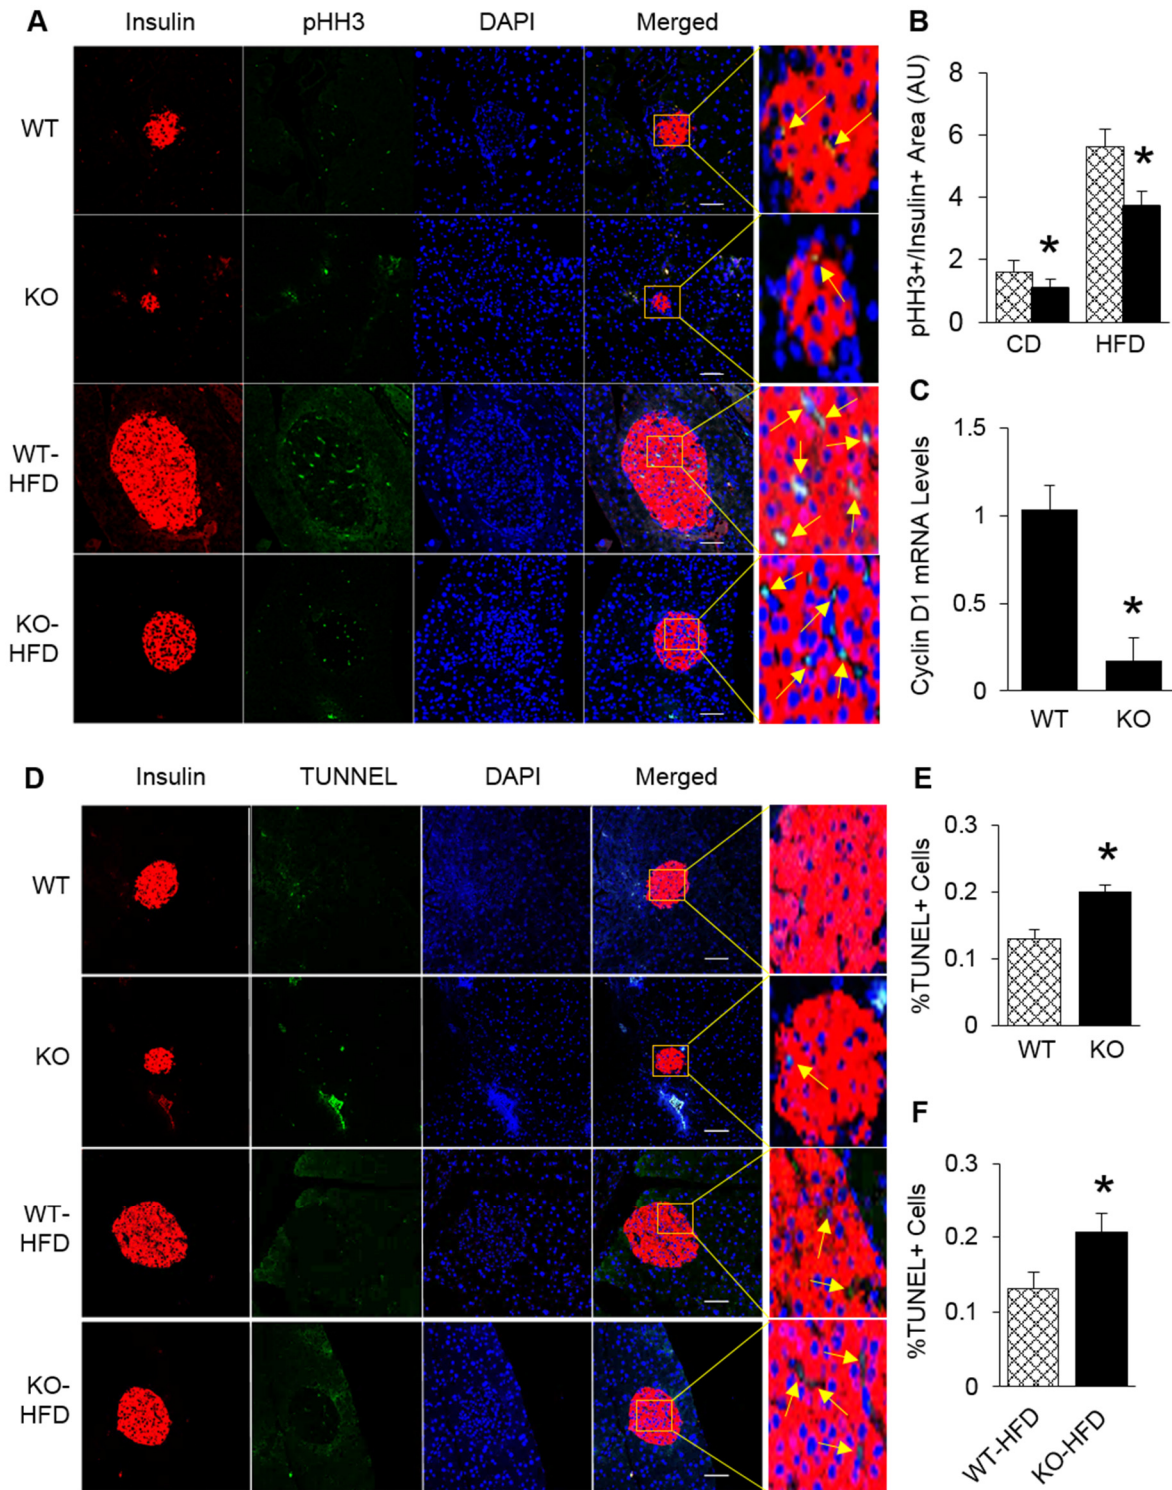

**Figure S2.** *A-B*: Representative images (A) of immunofluorescent staining of pancreatic tissue with insulin and pHH3 antibodies and quantification (B). *C*: qPCR results showed decreased levels of Cyclin D1 in islets of miR-223 KO mice; *D*: Representative images of pancreatic tissue stained with insulin and TUNEL. *E-F*: quantification of TUNEL positive cells within islets from CD-fed mice (E) and HFD-fed mice (F). Scale bar, 100 $\mu$ m; Data are shown as Mean  $\pm$  SEM (error bar).\*,  $p < 0.05$  vs. controls by  $t$ -test.

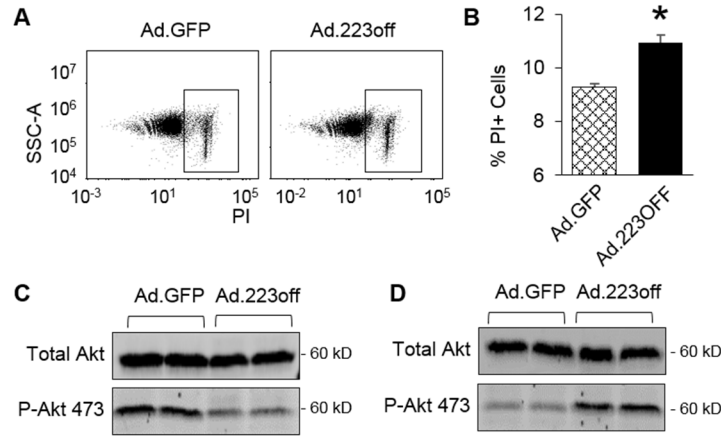

**Figure S3.** Min6  $\beta$ -cells were infected with adenovirus encoding Ad.223off to knockdown miR-223. *A-B*: Representative figures of FACS analysis of Min6  $\beta$ -cells stained with PI, as indicator of cell death. *C-D*: protein levels of phosphorylated Akt at Ser(p)473 sites were measured. Data are shown as Mean  $\pm$  SEM (error bar).\*,  $p < 0.05$  vs. controls by *t*-test.

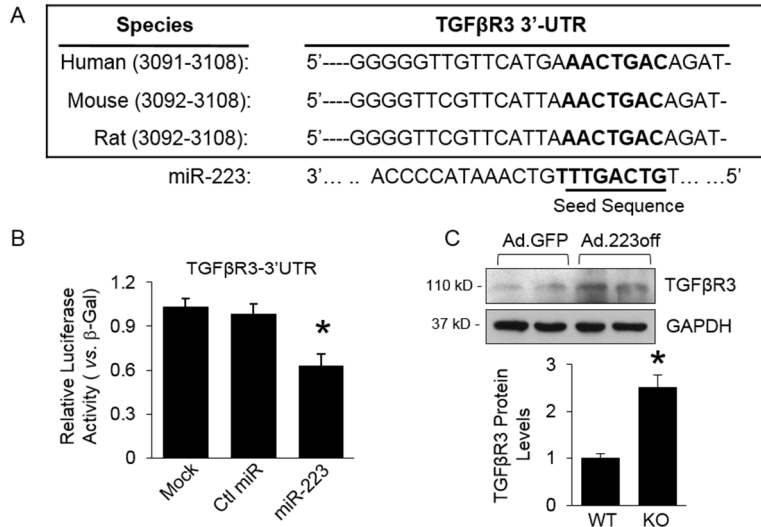

**Figure S4.** MiR-223 directly targets TGF $\beta$ 3. *A*: The putative miR-223 binding sites in the 3'-UTR regions of TGF $\beta$ 3 is conserved among mammalian species (human, mouse and rat). *B*: Luciferase reporter assays showed that TGF $\beta$ 3 was authentic target of miR-223 in HEK293 cells. *C*: Protein levels of TGF $\beta$ 3 were significantly increased in Min6  $\beta$ -cells after knocking down miR-223. Data are shown as Mean  $\pm$  SEM (error bar).\*,  $p < 0.05$  vs. controls by *t*-test.

**Supplemental Table 1.** Primer sequences for PCR (5' to 3')

| Gene      | Forward Primer              | Reverse Primer          |
|-----------|-----------------------------|-------------------------|
| miR-223   | GCAGAGTGTCAAGTTTGTCAAAT     | GTGCAGGGTCCGAGGT        |
| Nkx6.1    | TCAGTCAAGGTCTGGTTCC         | CGATTTGTGCTTTTTTCAGCA   |
| NeuroD1   | GACCCAGAACTGTCTAAAATAGAGACA | AAGGAGACCAGATCA GGGCTTT |
| Ucn3      | GCTGTGCCCTCGACCT            | TGGGCATCAGCATCGCT       |
| Ngn3      | CTAAGAGCGAGTTGGCACTGA       | GAGGTTGTGCATTTCGATTGCG  |
| Cyclin D1 | AGTGCCTGCAGAAGGAGATT        | CACAACTTCTCGGCAGTCAA    |
| Cyclin E1 | CCTCCAAAGTTGCACCAGTT        | GGACGCACAGGTCTACAAGC    |
| Mafa      | AGCGGCACATTCTGGAGAG         | TTGTACAGGTCCCGCTCCTT    |

**Supplemental Table 2.** Antibodies for western blot assay used in the experiments

| Name             | Source | Manufacturer                        | Dilution |
|------------------|--------|-------------------------------------|----------|
| Anti-foxo1       | rabbit | #2880, Cell Signaling Technology    | 1:1000   |
| Anti-p-foxo1     | rabbit | #9461, Cell Signaling Technology    | 1:1000   |
| Anti-Sox6        | mouse  | sc-393314, Santa Cruz Biotechnology | 1:1000   |
| Anti-Pdx1        | rabbit | 07-696, Millipore                   | 1:1000   |
| Anti-Glut2       | rabbit | ab95256, Abcam                      | 1:1000   |
| Anti-p27         | rabbit | ab32034, Abcam                      | 1:1000   |
| Anti-GAPDH       | rabbit | #2118S, Cell Signaling Technology   | 1:1000   |
| Anti-Akt         | rabbit | #9272, Cell Signaling Technology    | 1:1000   |
| Anti-p-Akt(S473) | rabbit | #9271, Cell Signaling Technology    | 1:1000   |
| Anti-p-Akt(T308) | rabbit | #9275, Cell Signaling Technology    | 1:1000   |
| Anti-insulin     | mouse  | sc-8033, Santa Cruz Biotechnology   | 1:100    |
| Anti-insulin     | rabbit | sc-9168, Santa Cruz Biotechnology   | 1:100    |
| Anti-Ki67        | mouse  | #9449, Cell Signaling Technology    | 1:100    |
| Anti-pHH3        | rabbit | #3377T, Cell Signaling Technology   | 1:100    |
